# Supplementary material
Source: PubMed Central journal article supplement (PMC1360599)

**H**(Human)

**C**(Chimpanzee)

$N_h$

$N_c$

**O**

**B**(Baboon)

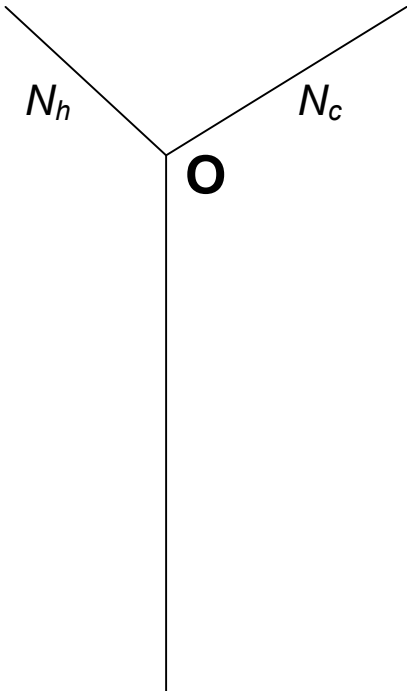

Supplement: pnas_0510716103_1.pdf [file pnas_0510716103_1.pdf]
